# Supplementary material
Source: PubMed Central journal article supplement (PMC6288323)
Supplement: ee23298f19e7b87dc3953a8311364243_JVI.01324-18-s0001.pdf [file ee23298f19e7b87dc3953a8311364243_JVI.01324-18-s0001.pdf]

**Identification of anti-norovirus genes in human cells using genome-wide CRISPR activation screening**

**Authors:** Robert C. Orchard<sup>1,2\*</sup>, Meagan Sullender<sup>1</sup>, Bria Dunalp<sup>1</sup>, Dale R. Balce<sup>1</sup>, John G. Doench<sup>3</sup>, and Herbert W. Virgin<sup>1\*</sup>

**Supplemental Materials:**

Trim7 cDNA sequences    page 2

sgRNAs used in this study page 3

## Trim7 cDNA sequences:

### DNA sequence for Trim7 isoform 1 codon optimized:

ATGGCGGCGGTAGGCCCGCGCACCGGACCGGGCACGGGCGCGGAAGCACTGGCGCTTGCTGCTG  
AATTGCAGGGAGAAGCCACTTGTCTATTTGTCTCGAACTTTTCAGAGAGCCGGTAAGCGTTGA  
ATGCGGCCATTCTTTCTGCCGCGCGTGCATAGGCCGATGCTGGGAGCGGCCCGGTGCCGGAAGT  
GTCGGAGCTGCAACCCGCGCACCGCCCTTCCCTTTGCCCTGCCCTCAATGCCGAGAGCCCGCAC  
GACCGTCCCAATTGCGCCCAAATCGCCAACCTGGCCGCGAGTAGCAACACTTCTGCGCCGATTTTC  
TTTGCCGGCTGCCGCCCGCGGAACATGGTAGCCAGGCTGCTGCCGCGAGGGCCGCGCCGCT  
AGGTGCGGACAACACGGTGAGCCATTTAAGCTCTATTGCCAGGACGACGGGCGCGCAATTTGTG  
TAGTGTGCGACCGGGCCAGAGAACATCGCGAACATGCCGTCTTGCCGCTCGATGAGGCGGTCCA  
GGAAGCGAAAGAACTGCTTGAATCAAGGTTGCGGGTCCCTCAAGAAGGAGCTTGAAGACTGTGAA  
GTATTTTCGATCCACGGAAAAAAGGAGTCCAAAGAACTTTTGAAGCAAATGGCCGCCGAGCAGG  
AGAAGGTCGGTGCCGAGTTCAGGCGTTGCGCGCATTCCCTTGTCGAACAAGAGGGCAGATTGCT  
CGGACGCTTGAGGAACTGTCAAGGGAAAGTGGCCCAAAGCAGAATGAAAATCTCGCCCAACTG  
GGGTGGAAATAACTCAACTGAGTAAACTGTCTCTCAGATACAAGAGACTGCACAGAAACCAG  
ACTTGATTTCCCTCCAAGAGTTCAGTCAACGTTGAGCCGATGCTCAAATGTACCCGGGCCAAA  
ACCCACGACTGTCTCAAGTGAGATGAAAAATAAGGTTTGGAAATGTCTCTCTCAAGACGTTTGT  
CTCAAGGGTATGCTTAAGAAGTTTAAAGAGGATCTGCGGGGGGAATTGGAGAAGGAGGAAAAG  
TAGAGCTGACTTTGGATCCCGACACTGCCAATCCGAGGTTGATTCTTTCCCTTGATCTTAAAG  
CGTTCGGTTGGGTGAGCGCGCGCAGGATTTGCCCAACCACCCTTGTCGGTTTCGACACAAATACG  
AGGGTGTCTCGCCAGTTGCGGTTTTTCTTCAGGGCGGCATCATTGGGAAGTTGAAGTCGGATCTA  
AGGACGGGTGGGCTTTCGGCGTAGCTCGGGAAAGCGTGAGGAGGAAGGGGCTGACACCGTTTAC  
TCCGGAGGAAGGGGTATGGGCTTTGCAGCTTAACGGGGGCCAATATTGGGCAGTCACTAGTCCC  
GAGCGATCTCCTCTGTCTGTGCCATCTTTCTAGAGTTAGGGTGGCGTTGGACCTCGAGGTTG  
GCGCGGTGTCAATCTACGCAGTGAAGACATGCGGCATTTGTATACTTTCCGCGTCAATTTTCA  
AGAACGGGTCTTTCCACTCTTTAGCGTGTGCTCTACAGGCACCTACTTGCGAATATGGCCG

### DNA sequence for Trim7 isoform 4 codon optimized:

ATGGCTGCTGTCGGTCCACGGACCGGCCCGGTACAGGTGCAGAAGCACTTGCGTTGGCGGCCG  
AACTTCAGGGGGAGGCGACGTGTAGCATCTGTCTTGAATTGTTCCGAGAGCCCGTTAGCGTGGA  
GTGCGGACACTCTTTTTGCCGCGCTTGCATCGGGAGATGTTGGGAGCGCCCTGGTGCAGGAAGT  
GTAGGCGCTGCTACGCGAGCGCCTCCATTTCCGCTGCCATGTCCACAGTGTGAGAAACCCGCAC  
GACCATCCAGCTTCGGCCAAATCGCCAATTGGCAGCTGTGGCCACCCTGCTTAGGCGCTTCTC  
ACTGCCAGCGGCCGCACCAGGAGAACATGGGAGCCAGGCCGCAGCCGCCAGAGCTGCCGCAGCG  
AGATGCGGGCAGCATGGAGAGCCATTCAAACCTCTATTGCCAGGATGACGGGCGAGCCATCTGCG  
TAGTATGTGACAGAGCACGAGAGCATAGAGAACACGCAGTGTCCCTCTGGATGAGGCCGTACA  
AGAGGCGAAAGAACTGCTCGAATCAAGGCTTAGGGTTCTCAAGAAGGAGTTGGAAGACTGCGAG  
GTTTTTAGGTCTACAGAGAAAAAAGAAAGCAAGGAGCTTCTTGTCTCTCAGGCACCTGCTGGTC  
CACCGTGGGACATAACGGAGGCG

### sgRNAs used in this study

| Gene Name | Guide I.D. | Guide Sequence       |
|-----------|------------|----------------------|
| TRIM7     | Guide A    | GAGCGCAGATCCGGGGCGCA |
| TRIM7     | Guide B    | GCTGGTGGAGCGCAGATCCG |
| MUC1      | Guide A    | TCCCCAACCATTCCTGGGTA |
| MUC1      | Guide B    | CTCCCCAACCATTCCTGGGT |
| LRRC15    | Guide A    | GTACCCTGTAGTGTGAGCCC |
| LRRC15    | Guide B    | GTGCAGTGCCTGCATGTCCC |
| PLSCR1    | Guide A    | GGACCCACGAGACTACTGGA |
| PLSCR1    | Guide B    | AGGGTGAAGGAGCTGGAGGA |
| HOXC11    | Guide A    | AGCACTTCGCAGACGTAGGA |
| HOXC11    | Guide B    | GCACTTCGCAGACGTAGGAG |
| GBP2      | Guide A    | GGAACCTTCCACTTTATCAT |
| GBP2      | Guide B    | TGACAGCTGTGCTGGTAAGA |
| MX1       | Guide A    | CAGAAACGAAACCTAGCTCC |
| MX1       | Guide B    | ACTCACAGACCCTGTGCTGA |
| BLNK      | Guide A    | TTATTAAAGTTTACACAAAG |
| BLNK      | Guide B    | ATCTGGATAGCCAGCCAGCT |
| CD4       | Guide A    | CATGTTCCCTGAGAGCCTGG |
| CD4       | Guide B    | ATGTTCCCTGAGAGCCTGGG |
| CD45      | Guide A    | CTTCTCCAAAATACTGTAA  |
